# Supplementary material
Source: PubMed Central journal article supplement (PMC3845884)
Supplement: NIHMS532303-supplement-01.pdf [file NIHMS532303-supplement-01.pdf]

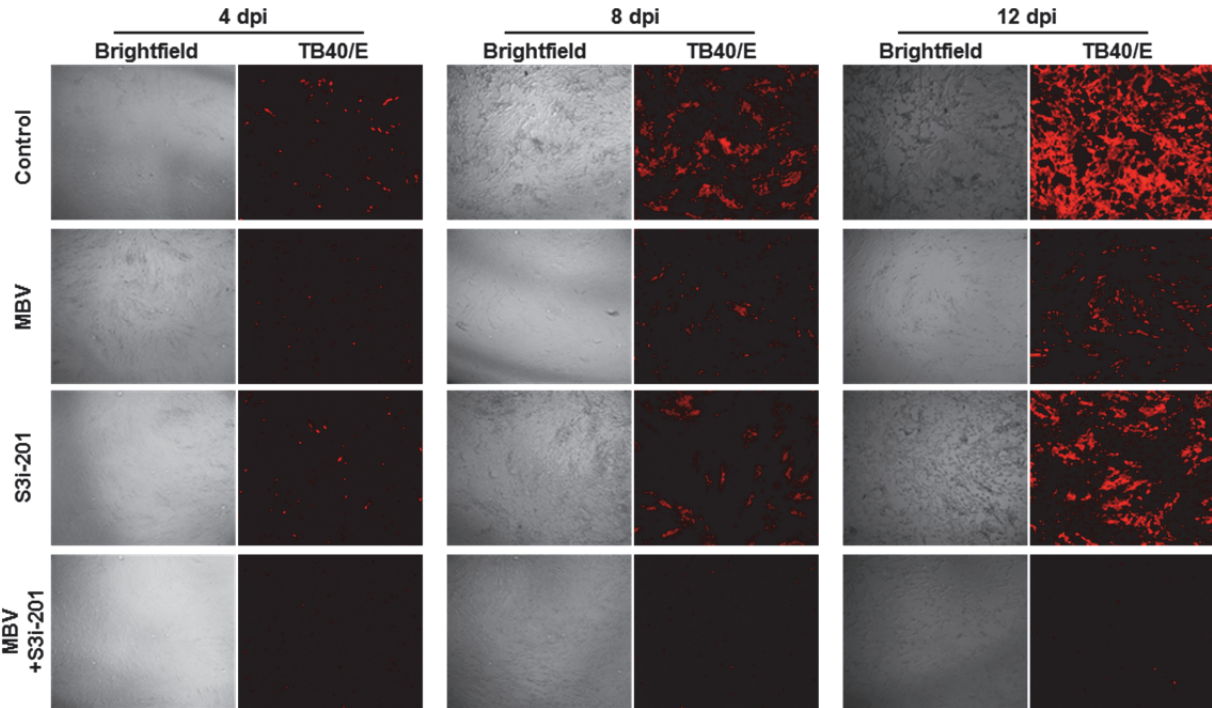

**Figure S1. Co-treatment with S3i-201 and maribavir (MBV) inhibits spread of HCMV infection.** MRC5 fibroblasts were pretreated with 100  $\mu$ M S3i-201 or DMSO. After 24 h, cells were infected at 0.25 IU/cell with TB40/E virus. Cells were treated with 40  $\mu$ M MBV or DMSO at the time of infection. At the indicated days post infection, live cells were imaged for viral infection (TB40/E expressing mCherry) and cell morphology (brightfield) using fluorescence microscopy. Images were acquired using a 4x objective lens.
